# Supplementary material
Source: PubMed Central journal article supplement (PMC5625841)
Supplement: NIHMS901761-supplement-8.pdf [file NIHMS901761-supplement-8.pdf]

**Cell, Volume 170**

**Supplemental Information**

**Lis1 Has Two Opposing Modes  
of Regulating Cytoplasmic Dynein**

**Morgan E. DeSantis, Michael A. Cianfrocco, Zaw Min Htet, Phuoc Tien Tran, Samara L. Reck-Peterson, and Andres E. Leschziner**

**Table S1. Summary of velocity and binding data, Related to Figures 1 and 5.**

| <b>Average velocity +/- SE (nm/s)</b>                                                                               |                 |
|---------------------------------------------------------------------------------------------------------------------|-----------------|
| Dyn <sup>wt</sup>                                                                                                   | 89.16 +/- 4.54  |
| Dyn <sup>wt</sup> + 300 nM Lis1                                                                                     | 39.55 +/- 2.11  |
| Dyn <sup>WA</sup>                                                                                                   | 18.50 +/- 0.52  |
| Dyn <sup>WA</sup> + 300 nM Lis1                                                                                     | 0.22 +/- 0.03   |
| Dyn <sup>WB</sup>                                                                                                   | 4.77 +/- 0.19   |
| Dyn <sup>WB</sup> + 300 nM Lis1                                                                                     | 8.73 +/- 0.42   |
| Dyn <sup>EQN</sup>                                                                                                  | 81.40 +/- 4.52  |
| Dyn <sup>EQN</sup> + 300 nM Lis1                                                                                    | 42.31 +/- 1.10  |
| Dyn <sup>WB/EQN</sup>                                                                                               | 4.96 +/- 0.20   |
| Dyn <sup>WB/EQN</sup> + 300 nM Lis1                                                                                 | 3.28 +/- 0.13   |
| <b>Apparent K<sub>d</sub> +/- SE (nM)<br/>for Lis1 in the presence of 1mM ATP-Vi</b>                                |                 |
| Dyn <sup>wt-M</sup>                                                                                                 | 49.78 +/- 6.1   |
| Dyn <sup>WA-M</sup>                                                                                                 | 40.95 +/- 5.1   |
| Dyn <sup>WB-M</sup>                                                                                                 | 55.25 +/- 7.5   |
| Dyn <sup>EQN-M</sup>                                                                                                | 196.30 +/- 30.8 |
| <b>Microtubule binding density +/- SE (pM<sup>-1</sup> μm<sup>-1</sup>)<br/>in the presence of 1mM ATP</b>          |                 |
| Dyn <sup>wt</sup>                                                                                                   | 0.033 +/- 0.002 |
| Dyn <sup>WA</sup>                                                                                                   | 0.50 +/- 0.06   |
| Dyn <sup>WB</sup>                                                                                                   | 0.50 +/- 0.03   |
| Dyn <sup>EQN</sup>                                                                                                  | 0.035 +/- 0.003 |
| Dyn <sup>WB/EQN</sup>                                                                                               | 0.48 +/- 0.03   |
| <b>Microtubule binding density +/- SE (pM<sup>-1</sup> μm<sup>-1</sup>)<br/>in the presence of 1mM ATP-Vi</b>       |                 |
| Dyn <sup>wt</sup>                                                                                                   | 0.037 +/- 0.004 |
| Dyn <sup>WA</sup>                                                                                                   | 0.24 +/- 0.03   |
| Dyn <sup>WB</sup>                                                                                                   | 0.36 +/- 0.01   |
| Dyn <sup>EQN</sup>                                                                                                  | 0.040 +/- 0.002 |
| Dyn <sup>WB/EQN</sup>                                                                                               | 0.34 +/- 0.01   |
| <b>Microtubule binding density +/- SE (pM<sup>-1</sup> μm<sup>-1</sup>)<br/>in the presence of 1mM ADP</b>          |                 |
| Dyn <sup>wt</sup>                                                                                                   | 0.53 +/- 0.03   |
| Dyn <sup>WA</sup>                                                                                                   | 1.8 +/- 0.2     |
| Dyn <sup>WB</sup>                                                                                                   | 1.6 +/- 0.1     |
| <b>Microtubule binding density +/- SE (pM<sup>-1</sup> μm<sup>-1</sup>)<br/>in the absence of nucleotides (Apo)</b> |                 |
| Dyn <sup>wt</sup>                                                                                                   | 1.48 +/- 0.03   |
| Dyn <sup>WA</sup>                                                                                                   | 1.8 +/- 0.1     |
| Dyn <sup>WB</sup>                                                                                                   | 2.9 +/- 0.1     |

**Table S2: Summary of cryo-EM data, related to Figures 2 and 3**

| <b>Data collection</b>                           | <b>Dyn<sup>wt-M</sup>:Lis1</b> | <b>Dyn<sup>WB-M</sup>:Lis1</b> |
|--------------------------------------------------|--------------------------------|--------------------------------|
| Microscope                                       | FEI Talos Arctica              | FEI Talos Arctica              |
| Voltage (kV)                                     | 200                            | 200                            |
| Detector                                         | Gatan K2 Summit                | Gatan K2 Summit                |
| Pixel size (Å)                                   | 0.60                           | 0.60                           |
| Defocus range (µm)                               | 1.5-4.0                        | 2.5-5.5                        |
| Movies                                           | 5614                           | 4826                           |
| Frames/movie                                     | 53                             | 25                             |
| Dose rate (electrons/pixel/s)                    | 10.285                         | 10.00                          |
| Total dose (electrons/Å <sup>2</sup> )           | 82                             | 50                             |
| Number of particles                              | 25,520                         | 27,807                         |
| Map-sharpening <i>B</i> factor (Å <sup>2</sup> ) | -50                            | -800                           |
| Final overall resolution (Å)                     | 7.7                            | 10.2                           |

**Table S3. *S. cerevisiae* strains used in this study.**

| <b>Strain</b> | <b>Genotype</b>                                                                                                                                                   |
|---------------|-------------------------------------------------------------------------------------------------------------------------------------------------------------------|
| RPY1          | W303a ( <i>MATa, his3-11,15, ura3-1, leu2-3,112, ade2-1, trp1-1</i> )                                                                                             |
| RPY799        | W303a <i>pep4Δ::HIS5, prb1Δ, P<sub>GAL1</sub>-8HIS-ZZ-SNAP-gs-PAC1, dyn1Δ::cgLEU2</i>                                                                             |
| RPY816        | W303a <i>pep4Δ::HIS5, prb1Δ, P<sub>GAL1</sub>-8HIS-ZZ-Tev-PAC1, dyn1Δ::cgLEU2, ndl1Δ::Hygro<sup>R</sup></i>                                                       |
| RPY1099       | W303a <i>pep4Δ::HIS5, prb1Δ, P<sub>GAL1</sub>-8HIS-ZZ-Tev-KIP2-g-FLAG-ga-SNAP-Kan<sup>R</sup></i>                                                                 |
| RPY1167       | W303a <i>pep4Δ::HIS5, prb1Δ, P<sub>GAL1</sub>-ZZ-TEV-GFP-3XHA-GST-DYN1(331kDa)-gsDHA-KanR, pac1Δ, ndl1Δ::cgLEU2</i>                                               |
| RPY1302       | W303a <i>pep4Δ::HIS5, prb1Δ, PAC11-13xMYC-TRP1, P<sub>GAL1</sub>-ZZ-Tev-DYN1(331kDa), pac1Δ::Hygro<sup>R</sup></i>                                                |
| RPY1385       | <i>MATa lys2-801 leu2-Δ1 his3-Δ200 trp1-Δ63 DYN1-3XGFP::TRP1, ura3-52::CFP-TUB1::URA3, SPC110-tdTomato::SpHIS5, ura3Δ::KanMX</i>                                  |
| RPY1536       | W303a <i>pep4Δ::HIS5, prb1Δ, P<sub>GAL1</sub>-ZZ-TEV-GFP-3XHA-GST-DYN1(331kDa)<sup>K3116A, K3117A, E3122A, R3124A</sup>-gsDHA-KanR, pac1Δ, ndl1Δ::cgLEU2</i>      |
| RPY1547       | W303a <i>pep4Δ::HIS5, prb1Δ, P<sub>GAL1</sub>-8HIS-ZZ-Tev-PAC1<sup>R275A, R301A, R378A, W419A, K437A</sup>, dyn1Δ::cgLEU2, ndl1Δ::Hygro<sup>R</sup></i>           |
| RPY1630       | W303a <i>pep4Δ::HIS5, prb1Δ, P<sub>GAL1</sub>-ZZ-TEV-GFP-3XHA-GST-DYN1(331kDa)<sup>K2424A</sup>-gsDHA-KanR, pac1Δ, ndl1Δ::cgLEU2</i>                              |
| RPY1635       | W303a <i>pep4Δ::HIS5, prb1Δ, PAC11-13xMYC-TRP1, P<sub>GAL1</sub>-ZZ-Tev-DYN1(331kDa)<sup>K2424A</sup>, pac1Δ::Hygro<sup>R</sup></i>                               |
| RPY1653       | W303a <i>pep4Δ::HIS5, prb1Δ, P<sub>GAL1</sub>-ZZ-TEV-GFP-3XHA-GST-DYN1(331kDa)<sup>E2488Q</sup>-gsDHA-KanR, pac1Δ, ndl1Δ::cgLEU2</i>                              |
| RPY1654       | W303a <i>pep4Δ::HIS5, prb1Δ, PAC11-13xMYC-TRP1, P<sub>GAL1</sub>-ZZ-Tev-DYN1(331kDa)<sup>E2488Q</sup>, pac1Δ::Hygro<sup>R</sup></i>                               |
| RPY1705       | W303a <i>pep4Δ::HIS5, prb1Δ, P<sub>GAL1</sub>-ZZ-TEV-GFP-3XHA-GST-DYN1(331kDa)<sup>E3012A, Q3014A, N3018A</sup>-gsDHA-KanR, pac1Δ, ndl1Δ::cgLEU2</i>              |
| RPY1707       | W303a <i>pep4Δ::HIS5, prb1Δ, P<sub>GAL1</sub>-ZZ-TEV-GFP-3XHA-GST-DYN1(331kDa)<sup>E2488Q, E3012A, Q3014A, N3018A</sup>-gsDHA-KanR, pac1Δ, ndl1Δ::cgLEU2</i>      |
| RPY1708       | <i>MATa lys2-801 leu2-Δ1 his3-Δ200 trp1-Δ63 DYN1<sup>E3012A, Q3014A, N3018A</sup>-3XGFP::TRP1, ura3-52::CFP-TUB1::URA3, SPC110-tdTomato::SpHIS5, ura3Δ::KanMX</i> |

|         |                                                                                                                                                                                     |
|---------|-------------------------------------------------------------------------------------------------------------------------------------------------------------------------------------|
| RPY1713 | W303a <i>pep4Δ::HIS5, prb1Δ, PAC11-13xMYC-TRP1, P<sub>GAL1</sub>-ZZ-Tev-DYN1(331kDa)<sup>E3012A,Q3014A,N3018A</sup>, pac1Δ:: Hygro<sup>R</sup></i>                                  |
| RPY1717 | <i>MATa lys2-801 leu2-Δ1 his3-Δ200 trp1-Δ63 DYN1-3XGFP::TRP1, ura3-52::CFP-TUB1::URA3, SPC110-tdTomato::SpHIS5, ura3Δ::KanMX, pac1Δ::klURA3</i>                                     |
| RPY1725 | W303a <i>pep4Δ::HIS5, prb1Δ, P<sub>GAL1</sub>-ZZ-TEV-GFP-3XHA-GST-DYN1(331kDa)<sup>E3012A,Q3014A,N3018A, K3116A, K3117A, E3122A, R3124A</sup>, gsDHA-KanR, pac1Δ, ndl1Δ::cgLEU2</i> |
